1 **Five years of GenoTyphi: updates to the global *Salmonella* Typhi genotyping**  
2 **framework**

3

4 Zoe A. Dyson<sup>1,2,3,4,\*</sup> and Kathryn E. Holt<sup>1,2</sup>

5

6 **Affiliations:**

7 1. London School of Hygiene & Tropical Medicine, London WC1E 7HT, UK

8 2. Department of Infectious Diseases, Central Clinical School, Monash University,  
9 Melbourne, Victoria 3004, Australia

10 3. Cambridge Institute of Therapeutic Immunology & Infectious Disease (CITIID),  
11 Department of Medicine, University of Cambridge, Cambridge, CB2 0AW, UK.

12 4. Wellcome Sanger Institute, Wellcome Genome Campus, Hinxton, Cambridge, CB10 1RQ,  
13 UK.

14

15 **Correspondence:**

16 \* indicates corresponding author

17 E-mail: [zoe.dyson@lshtm.ac.uk](mailto:zoe.dyson@lshtm.ac.uk)

18 Tel: +44 (0) 20 7636 8636

19 Fax: +44 (0)20 7436 5389

20

21

22 **Running title:** GenoTyphi genotyping framework update

23

24 **Abstract word count:** 93

25 **Text word count:** 1449

26 **Abstract**

27 In 2016 a whole genome sequence (WGS) based genotyping framework (GenoTyphi) was  
28 developed providing a phylogenetically informative nomenclature for lineages of *Salmonella*  
29 Typhi, the aetiological agent of typhoid fever. Subsequent surveillance studies have revealed  
30 additional epidemiologically important subpopulations, necessitating the definition of new  
31 genotypes and extension of associated software to facilitate the detection of antimicrobial  
32 resistance (AMR) mutations. Analysis of 4,632 WGS provide an updated overview of the  
33 global *S. Typhi* population structure and genotyping framework, revealing the widespread  
34 nature of H58 (4.3.1) genotypes and the diverse range of genotypes carrying AMR mutations.

35

36 **Key words:** Typhoid fever, *Salmonella* Typhi, WGS, pathogen genotyping, AMR,  
37 Azithromycin, Fluoroquinolones, Surveillance

38

39

40 **Background**

41 Typhoid fever is a faeco-orally transmitted systemic infection caused by the bacterium  
42 *Salmonella* Typhi (*S. Typhi*). Each year >10 million cases occur worldwide of which  
43 >100,000 are associated with mortalities<sup>1</sup> making it a public health threat in many low- to  
44 middle-income countries with limited hygiene and sanitation infrastructure.

45

46 *S. Typhi* is a genetically monomorphic pathogen with a slow mutation rate that infrequently  
47 recombines<sup>2</sup>. Whole genome sequencing (WGS) and core-genome phylogenetics have  
48 become the standard for typhoid molecular epidemiology in both research and public health  
49 settings, providing insights into population structure, transmission dynamics, AMR  
50 emergence and dissemination, as well as outbreak investigation and monitoring of

51 implemented intervention strategies. In 2016 a WGS based genotyping framework for *S.*  
52 Typhi was developed using a collection of ~2,000 genomes from >60 countries<sup>3</sup>, with the  
53 goal of stratifying the pathogen population and providing a phylogenetically informative  
54 nomenclature with which to refer to different lineages. The resulting scheme (known as  
55 GenoTyphi) utilised 68 marker single nucleotide variants (SNVs) to define, based on an  
56 inferred genome-wide phylogeny, four primary clades, 16 clades, and 49 subclades organised  
57 in a pseudo-hierarchical nomenclature whereby primary clade 1 is subdivided into clades 1.1  
58 and 1.2; clade 1.1 is further subdivided into subclades 1.1.1, 1.1.2, and 1.1.3. Haplotype 58  
59 (H58), which has previously been associated with antimicrobial resistance (AMR) and global  
60 dissemination via intercontinental transmission events<sup>2</sup>, was designated genotype 4.3.1 under  
61 the new scheme. A software tool for calling GenoTyphi genotypes from WGS data was  
62 implemented in Python (available at: <https://github.com/katholt/genotypphi>), facilitating  
63 integration of the scheme into bioinformatics pipelines. GenoTyphi is also available to non-  
64 expert users via the online data analysis platform Typhi Pathogenwatch  
65 (<https://pathogen.watch/>)<sup>4</sup>.

66

67 Following publication of the initial framework, regional surveillance studies identified  
68 additional epidemiologically important subpopulations of *S. Typhi*, necessitating definition of  
69 new genotypes<sup>5-9</sup>. Further, point mutations responsible for reduced susceptibility to  
70 fluoroquinolones and azithromycin have also emerged<sup>10,11</sup>, necessitating extension of the  
71 GenoTyphi software tool for their detection. Here we provide an overview of updates to both  
72 the GenoTyphi scheme and pipeline (summarised in **Tables S1-S2**), as well as the view it  
73 provides of the global pathogen population.

74

75

## 76 **Materials and methods**

### 77 *Phylogenetic and SNV analysis of S. Typhi isolates*

78 Reads from 4,632 *S. Typhi* genomes (**Table S3**) were mapped to the reference sequence of *S.*  
79 *Typhi* CT18 (accession number: AL513382) with RedDog (vbeta.11; available at:  
80 <https://github.com/katholt/RedDog>). Sequences were assigned to genotypes, and quinolone  
81 resistance determining region (QRDR) and *acrB* mutations associated with AMR identified  
82 detected, using GenoTyphi (v1.9.1; available at: <https://github.com/katholt/genotyphi>) which  
83 is permanently archived by Zenodo at doi: 10.5281/zenodo.4707614. Recombinant regions  
84 were removed from the whole genome Single Nucleotide Variant (SNV) alignment using  
85 Gubbins (v2.4.1; available at: <https://github.com/sanger-pathogens/gubbins>) and a maximum-  
86 likelihood phylogeny inferred with RAxML (v8.2.9; available at  
87 <https://github.com/stamatak/standard-RAxML>). An interactive annotated phylogeny is  
88 available at <https://microreact.org/project/vBoskUuenEVmfVzrcAMx8R>. Further details are  
89 provided in **supplementary methods**.

90

91

## 92 **Results**

### 93 *Global overview of S. Typhi genotypes*

94 Analysis of 4,632 published genomes demonstrate that H58 has now disseminated across  
95 most continents (**Fig. 1a**), with the distribution of genotypes differing per country (**Fig. 1b**).  
96 The 82 genotypes defined at present (**Fig. 1c; Table S1**) include those from the original  
97 publication, subdivision of 4.3.1 (H58) into three major lineages (4.3.1.1, 4.3.1.2, 4.3.1.3),  
98 genotypes designating newly identified subclades (e.g. 2.5.2, 3.3.2), and designations for  
99 AMR populations of epidemiological importance (e.g. 4.3.1.1.P1).

100

101

102 **Figure 1. Global genotype distribution and population structure. (A) Global dissemination**  
103 **of genotype 4.3.1 (H58). Countries are coloured by total percentage of H58 genotypes**  
104 **amongst isolates in the genome collection, as per inset legend. (B) Dominant genotypes per**  
105 **location. Dominant genotypes (each accounting for >30% of sequenced isolates per country)**  
106 **and H58 genotypes are coloured as per the inset legend, with minor non-H58 genotypes in**  
107 **grey. Genotypes are shown for countries with at least 20 genome sequences. (C)**  
108 **Phylogenetic tree backbone showing the relationships between 16 clades and 63**  
109 **subclades/sublineages. Tree tips represent unique genotypes as labelled, background**  
110 **shading highlights clades (labelled in larger font). \* indicates genotypes added to the**  
111 **scheme following its initial publication, brackets indicate undifferentiated clades and**  
112 **primary clades.**

113

114

#### 115 **Updated H58 (4.3.1) genotypes**

116 Genotype 4.3.1 is currently subdivided into three lineages (see **Fig. 1c; Table S1**). H58  
117 lineages I (genotype 4.3.1.1) and II (genotype 4.3.1.2) were originally defined in a study of  
118 paediatric patients attending Patan Hospital in Kathmandu, Nepal<sup>12</sup>. Later studies<sup>8</sup> revealed  
119 the co-circulation of both lineages in this setting between 2008-2016, with a shift in  
120 dominance to 4.3.1.2 after 2010 (40% 4.3.1.2 pre-2010 and 74% post-2011,  $p=1.0 \times 10^{-7}$ ),  
121 warranting more discriminant typing to capture such changes in population structure. H58  
122 lineage III (genotype 4.3.1.3), originally defined in an examination of 536 AMR sequences  
123 from Dhaka, Bangladesh<sup>6</sup>, is a monophyletic cluster of genotype 4.3.1 mostly from  
124 Bangladesh (99%). It was recently detected at a frequency of 9% in urban Dhaka between  
125 2004-2016<sup>5</sup>. A monophyletic sublineage of genotype 4.3.1.3 was resistant to

126 fluoroquinolones (median minimal inhibitory concentration (MIC) of 4 µg/ml) and is here  
127 formally designated 4.3.1.3.Bdq based on previous studies<sup>6</sup>.

128

129 A recent study of asymptomatic carriers and acute typhoid fever patients in Kenya detected  
130 the co-circulation of genotypes 4.3.1.1 and 4.3.1.2<sup>9</sup>. Contextualisation with the global  
131 phylogeny attributed the presence of these lineages to two previously reported transmission  
132 waves originating in South Asia<sup>2,13</sup>, and a third more recent introduction of 4.3.1.2 from  
133 South Asia that has apparently also reached Uganda<sup>9</sup>. These three H58 sublineages were each  
134 comprised exclusively East African sequences and had different AMR profiles, and thus were  
135 designated as new genotypes in order to help monitor their spread: H58 lineage I sublineage  
136 East Africa I (4.3.1.1.EA1), H58 lineage II sublineage East Africa II (4.3.1.2.EA2) and H58  
137 lineage II sublineage East Africa III (4.3.1.2.EA3; **Fig. 1c; Table S1**)<sup>9</sup>.

138

139 In 2016, outbreaks of the first widespread extensively drug resistant (XDR) clone occurred in  
140 Pakistan. This monophyletic outbreak cluster of genotype 4.3.1.1, resistant to  
141 chloramphenicol, ampicillin, and co-trimoxazole, fluoroquinolones and third generation  
142 cephalosporins<sup>7,14</sup>, was designated genotype 4.3.1.1.P1 to aid its identification.

143

#### 144 ***Updated non-H58 genotypes***

145 Studies of *S. Typhi* in Bangladesh<sup>5</sup> revealed 119 genomes (14.5% of sequences analysed)  
146 formed a monophyletic group of sequences typed only to clade level (genotype 3.3) that were  
147 related to sequences from Nepal (separated by ~70 SNVs, also typed as 3.3). These were  
148 collectively designated genotype 3.3.2. Within the Bangladesh 3.3.2, two sublineages  
149 carrying QRDR mutations were further defined to facilitate their detection in future

150 surveillance studies; 3.3.2.Bd1 (which typically carry *gyrA*-S83F), and 3.3.2.Bd2 (which  
151 typically carry *gyrA*-S87N) (see **Fig. 1c**; **Table S1**).

152

153 Ongoing analysis of genomes from Madagascar and Papua New Guinea (to be described in  
154 detail elsewhere) have also identified localised variants. The Madagascar group belongs to  
155 clade 2.5, is distantly related to other 2.5 sequences from India (separated by ~122 SNVs)  
156 and has been designated 2.5.2. The PNG genotype 2.1.7 population is subdivided into two  
157 distinct sublineages designated genotypes 2.1.7.1 and 2.1.7.2, with 2.1.7.1 observed more  
158 frequently.

159

160

#### 161 ***Updated detection of resistance-associated mutations***

162 Aforementioned studies of paediatric typhoid in Kathmandu, Nepal revealed high levels  
163 (75.3%) of sequences carrying non-synonymous point mutations in the QRDR of genes *gyrA*,  
164 *gyrB*, and *parC* responsible for reduced susceptibility to fluoroquinolones from 2008-2016<sup>8</sup>.  
165 Among these were sequences of genotype 4.3.1.2 carrying three such mutations (e.g. *gyrA*-  
166 S83F, *gyrA*-D87N, *parC*-S80I – 7.6%; *gyrA*-S83F, *gyrA*-D87N, *parC*-E84K – 0.5%) the  
167 former of which was previously found to cause treatment failure among adult populations in  
168 the same setting<sup>11</sup>. More recent studies<sup>10</sup> demonstrated that mutations at codon 717 of gene  
169 *acrB*, a component of the AcrAB-TolC drug efflux pump, mediate Azithromycin resistance  
170 (MIC  $\geq$ 32  $\mu$ g/ml) in *S. Typhi* and had been observed at low frequency in Dhaka, Bangladesh  
171 (~1.3% of all *S. Typhi* isolated from 2009-2016). Subsequently, the GenoTyphi pipeline has  
172 been extended to detect mutations in both the QRDR and codon 717 of gene *acrB* (see **Table**  
173 **S2**).

174

175 **Figure 2. Global overview of AMR mutations. (A) Global distribution of QRDR mutations.**  
176 *Countries are coloured by the total percentage of sequences carrying QRDR mutations in the*  
177 *genome collection, as per inset legend. Locations where sequences also carrying *acrB-**  
178 *R717Q/L mutations have been isolated are indicated as labelled. (B) Distribution of QRDR*  
179 **mutations by genotype and region.** *Genotype/region combinations are included where >25*  
180 *isolates have been sequenced from the region and >5% of those carry QRDR mutations.*  
181 *Genotypes also carrying *acrB-R717Q/L* mutations are labelled as per the inset legend.*

182

183

#### 184 **Global overview of AMR associated mutations**

185 Analysis of published genomes demonstrates that sequences carrying QRDR mutations can  
186 now be found across most continents (**Fig. 2a**), with the diversity of genotypes carrying  
187 QRDR mutations varying by geographic region (**Fig. 2b**). The geographic distribution of  
188 sequences carrying *acrB-R717Q/L* mutations associated with azithromycin resistance are  
189 shown in **Fig. 2a-b**. These mutations have emerged independently in multiple *S. Typhi*  
190 genotypes in several different countries, mostly in South Asia at present, and are  
191 accompanied by QRDR mutations making them co-resistant to fluoroquinolones (see **Fig.**  
192 **2b**). Isolates from Dhaka<sup>10</sup> have also been reported to be multi-drug resistant carrying genes  
193 conferring additional resistance to chloramphenicol, ampicillin and co-trimoxazole. Recent  
194 studies<sup>15</sup> has revealed that these mutations now appear to be emerging in more non-H58  
195 genotypes in Dhaka from 2016 onwards including genotypes 2.3.3, 3.2.2, and 3.3.2.

196

197

#### 198 **Discussion**



199 In the five years since the publication of the GenoTyphi framework several regional genomic  
200 surveillance studies have been carried out, providing further insight into transmission events  
201 on a regional and global scale (including the continued global spread of 4.3.1 genotypes, and  
202 the emergence, spread, and ongoing evolution of mutations responsible for AMR in a diverse  
203 range of H58 and non-H58 genotypes) and the identification of new genotypes (**Tables S1-**  
204 **S2**).

205

206 The GenoTyphi framework will continue to be developed as new data becomes available and  
207 as new variants emerge, providing up to date phylogenetically informative nomenclature for  
208 identifying and discussing trends in population structure and evolution of AMR in *S. Typhi*.  
209 This nomenclature remains critical in genetic epidemiology studies required for the  
210 successful implementation and monitoring of control strategies. Requests for the inclusion of  
211 new genotypes can be made via the GitHub repository (<https://github.com/katholt/genotyphi>),  
212 and will be overseen by the Global Typhoid Genomics Consortium steering committee  
213 (<https://www.typhoidgenomics.org/>).

214

215

## 216 **Supplementary data**

- 217 • *Supplementary methods*
- 218 • *Table S1 - Summary of S. Typhi genotypes (Excel spreadsheet). ‘Reference allele’*  
219 *indicates the allele in the CT18 reference sequence. ‘Alternative allele’ indicates an*  
220 *allele called against the CT18 reference sequence for the genotype called. ‘Derived*  
221 *allele’ indicates the subtree-defining allele, which resulted from mutation of the*  
222 *original (ancestral) allele at this position to generate a new (derived) allele that we*  
223 *use as the marker for the subtree that corresponds to this genotype. ‘Ancestral allele’*

224 *indicates the allele present in the ancestor of S. Typhi, which is conserved by all*  
225 *members of the population outside of the subtree that corresponds to this genotype.*

- 226 • **Table S2 - Summary of S. Typhi AMR mutations detected by GenoTyphi (Excel**  
227 **spreadsheet).** *‘Reference allele’ indicates the allele in the CT18 reference sequence.*  
228 *‘Alternative allele’ indicates an allele called against the CT18 reference sequence for*  
229 *the genotype called.*
- 230 • **Table S3 – Details of publicly available S. Typhi genome sequences analysed in this**  
231 **study (Excel spreadsheet)**

232

### 233 **Conflict of interest statement**

234 The authors declare that they do not have a conflict of interest.

235

### 236 **Presentation statement**

237 This work was carried out for an invited presentation ‘A global genomic perspective on  
238 Typhoid and AMR’ by Zoe Anne Dyson at the 15<sup>th</sup> Asian Conference On Diarrhoeal Disease  
239 and Nutrition (ASCODD) on the 30<sup>th</sup> of January 2020 in Dhaka, Bangladesh.

240

### 241 **Funding statement**

242 ZAD was supported by a grant funded by the Wellcome Trust (STRATAA; 106158/Z/14/Z),  
243 and received funding from the European Union’s Horizon 2020 research and innovation  
244 programme under the Marie Skłodowska-Curie grant agreement TyphiNET (#845681). KEH  
245 was supported by a Senior Medical Research Fellowship from the Viertel Foundation of  
246 Australia, and the Bill and Melinda Gates Foundation, Seattle (grant #OPP1175797).

247

### 248 **Affiliation changes**

249 The authors have not changed affiliations since this study was completed.

250

251 **Corresponding author contact details**

252 Dr Zoe Anne Dyson

253 London School of Hygiene & Tropical Medicine

254 Keppel Street

255 London WC1E 7HT

256 United Kingdom

257 E-mail: [zoe.dyson@lshtm.ac.uk](mailto:zoe.dyson@lshtm.ac.uk)

258 Tel: +44 (0) 20 7636 8636

259 Fax: +44 (0)20 7436 5389

260

261 **References**

- 262 1 GBD 2017 Typhoid and Paratyphoid Collaborators. The global burden of typhoid and  
263 paratyphoid fevers: a systematic analysis for the Global Burden of Disease Study 2017.  
264 *The Lancet Infectious Diseases* 2019;**19**(4):369–81. Doi: 10.1016/S1473-  
265 3099(18)30685-6.
- 266 2 Wong Vanessa K, Baker Stephen, Pickard Derek J, Parkhill Julian, Page Andrew J,  
267 Feasey Nicholas A, et al. Phylogeographical analysis of the dominant multidrug-  
268 resistant H58 clade of Salmonella Typhi identifies inter- and intracontinental  
269 transmission events. *Nat Genet* 2015;**47**(6):632–9. Doi: 10.1038/ng.3281.
- 270 3 Wong Vanessa K, Baker Stephen, Connor Thomas R, Pickard Derek, Page Andrew J,  
271 Dave Jayshree, et al. An extended genotyping framework for Salmonella enterica  
272 serovar Typhi, the cause of human typhoid. *Nat Commun* 2016;**7**:12827. Doi:  
273 10.1038/ncomms12827.

- 274 4 Argimon Silvia, Yeats Corin A, Goater Richard J, Abudahab Khalil, Taylor Benjamin,  
275 Underwood Anthony, et al. A global resource for genomic predictions of antimicrobial  
276 resistance and surveillance of Salmonella Typhi at Pathogenwatch. *bioRxiv*  
277 2020:2020.07.03.186692. Doi: 10.1101/2020.07.03.186692.
- 278 5 Rahman Sadia Isfat Ara, Dyson Zoe A, Klemm Elizabeth J, Khanam Farhana, Holt  
279 Kathryn E, Chowdhury Emran Kabir, et al. Population structure and antimicrobial  
280 resistance patterns of Salmonella Typhi isolates in urban Dhaka, Bangladesh from 2004  
281 to 2016. *PLoS Negl Trop Dis* 2020;**14**(2):e0008036. Doi: 10.1371/journal.pntd.0008036.
- 282 6 Tanmoy Arif M, Westeel Emilie, De Bruyne Katrien, Goris Johan, Rajoharison Alain,  
283 Sajib Mohammad S I, et al. Salmonella enterica Serovar Typhi in Bangladesh:  
284 Exploration of Genomic Diversity and Antimicrobial Resistance. *mBio* 2018;**9**(6). Doi:  
285 10.1128/mBio.02112-18.
- 286 7 Klemm Elizabeth J, Shakoor Sadia, Page Andrew J, Qamar Farah Naz, Judge Kim,  
287 Saeed Dania K, et al. Emergence of an Extensively Drug-Resistant Salmonella enterica  
288 Serovar Typhi Clone Harboring a Promiscuous Plasmid Encoding Resistance to  
289 Fluoroquinolones and Third-Generation Cephalosporins. *mBio* 2018;**9**(1):346. Doi:  
290 10.1128/mBio.00105-18.
- 291 8 Britto Carl D, Dyson Zoe A, Duchene Sebastian, Carter Michael J, Gurung Meeru, Kelly  
292 Dominic F, et al. Laboratory and molecular surveillance of paediatric typhoidal  
293 Salmonella in Nepal: Antimicrobial resistance and implications for vaccine policy. *PLoS*  
294 *Negl Trop Dis* 2018;**12**(4):e0006408. Doi: 10.1371/journal.pntd.0006408.
- 295 9 Kariuki Samuel, Dyson Zoe A, Mbae Cecilia, Ngetich Ronald, Kawai Susan M, Wairimu  
296 Celestine, et al. Multiple introductions of multidrug-resistant typhoid associated with  
297 acute infection and asymptomatic carriage, Kenya. *bioRxiv* 2021:2021.03.10.434750.  
298 Doi: 10.1101/2021.03.10.434750.

- 299 10 Hooda Yogesh, Sajib Mohammad S I, Rahman Hafizur, Luby Stephen P, Bondy-  
300 Denomy Joseph, Santosham Mathuram, et al. Molecular mechanism of azithromycin  
301 resistance among typhoidal Salmonella strains in Bangladesh identified through passive  
302 pediatric surveillance. *PLoS Negl Trop Dis* 2019;**13**(11):e0007868. Doi:  
303 10.1371/journal.pntd.0007868.
- 304 11 Pham Thanh Duy, Karkey Abhilasha, Dongol Sabina, Ho Thi Nhan, Thompson Corinne  
305 N, Rabaa Maia A, et al. A novel ciprofloxacin-resistant subclade of H58 Salmonella  
306 Typhi is associated with fluoroquinolone treatment failure. *Elife* 2016;**5**:e14003. Doi:  
307 10.7554/eLife.14003.
- 308 12 Holt Kathryn E, Baker Stephen, Dongol Sabina, Basnyat Buddha, Adhikari Neelam,  
309 Thorson Stephen, et al. High-throughput bacterial SNP typing identifies distinct clusters  
310 of Salmonella Typhi causing typhoid in Nepalese children. *BMC Infectious Diseases*  
311 2010;**10**:144. Doi: 10.1186/1471-2334-10-144.
- 312 13 Park Se Eun, Pham Duy Thanh, Boinett Christine, Wong Vanessa K, Pak Gi Deok,  
313 Panzner Ursula, et al. The phylogeography and incidence of multi-drug resistant typhoid  
314 fever in sub-Saharan Africa. *Nat Commun* 2018;**9**(1):5094. Doi: 10.1038/s41467-018-  
315 07370-z.
- 316 14 Rasheed Farhan, Saeed Muhammad, Alikhan Nabil-Fareed, Baker David, Khurshid  
317 Mohsin, Ainsworth Emma V, et al. Emergence of Resistance to Fluoroquinolones and  
318 Third-Generation Cephalosporins in Salmonella Typhi in Lahore, Pakistan.  
319 *Microorganisms* 2020;**8**(9). Doi: 10.3390/microorganisms8091336.
- 320 15 Sajib Mohammad S I, Tanmoy Arif M, Hooda Yogesh, Rahman Hafizur, Andrews Jason  
321 R, Garrett Denise O, et al. Tracking the Emergence of Azithromycin Resistance in  
322 Multiple Genotypes of Typhoidal Salmonella. *mBio* 2021;**12**(1). Doi:  
323 10.1128/mBio.03481-20.



Percentage H58/4.3.1 sequenced per country

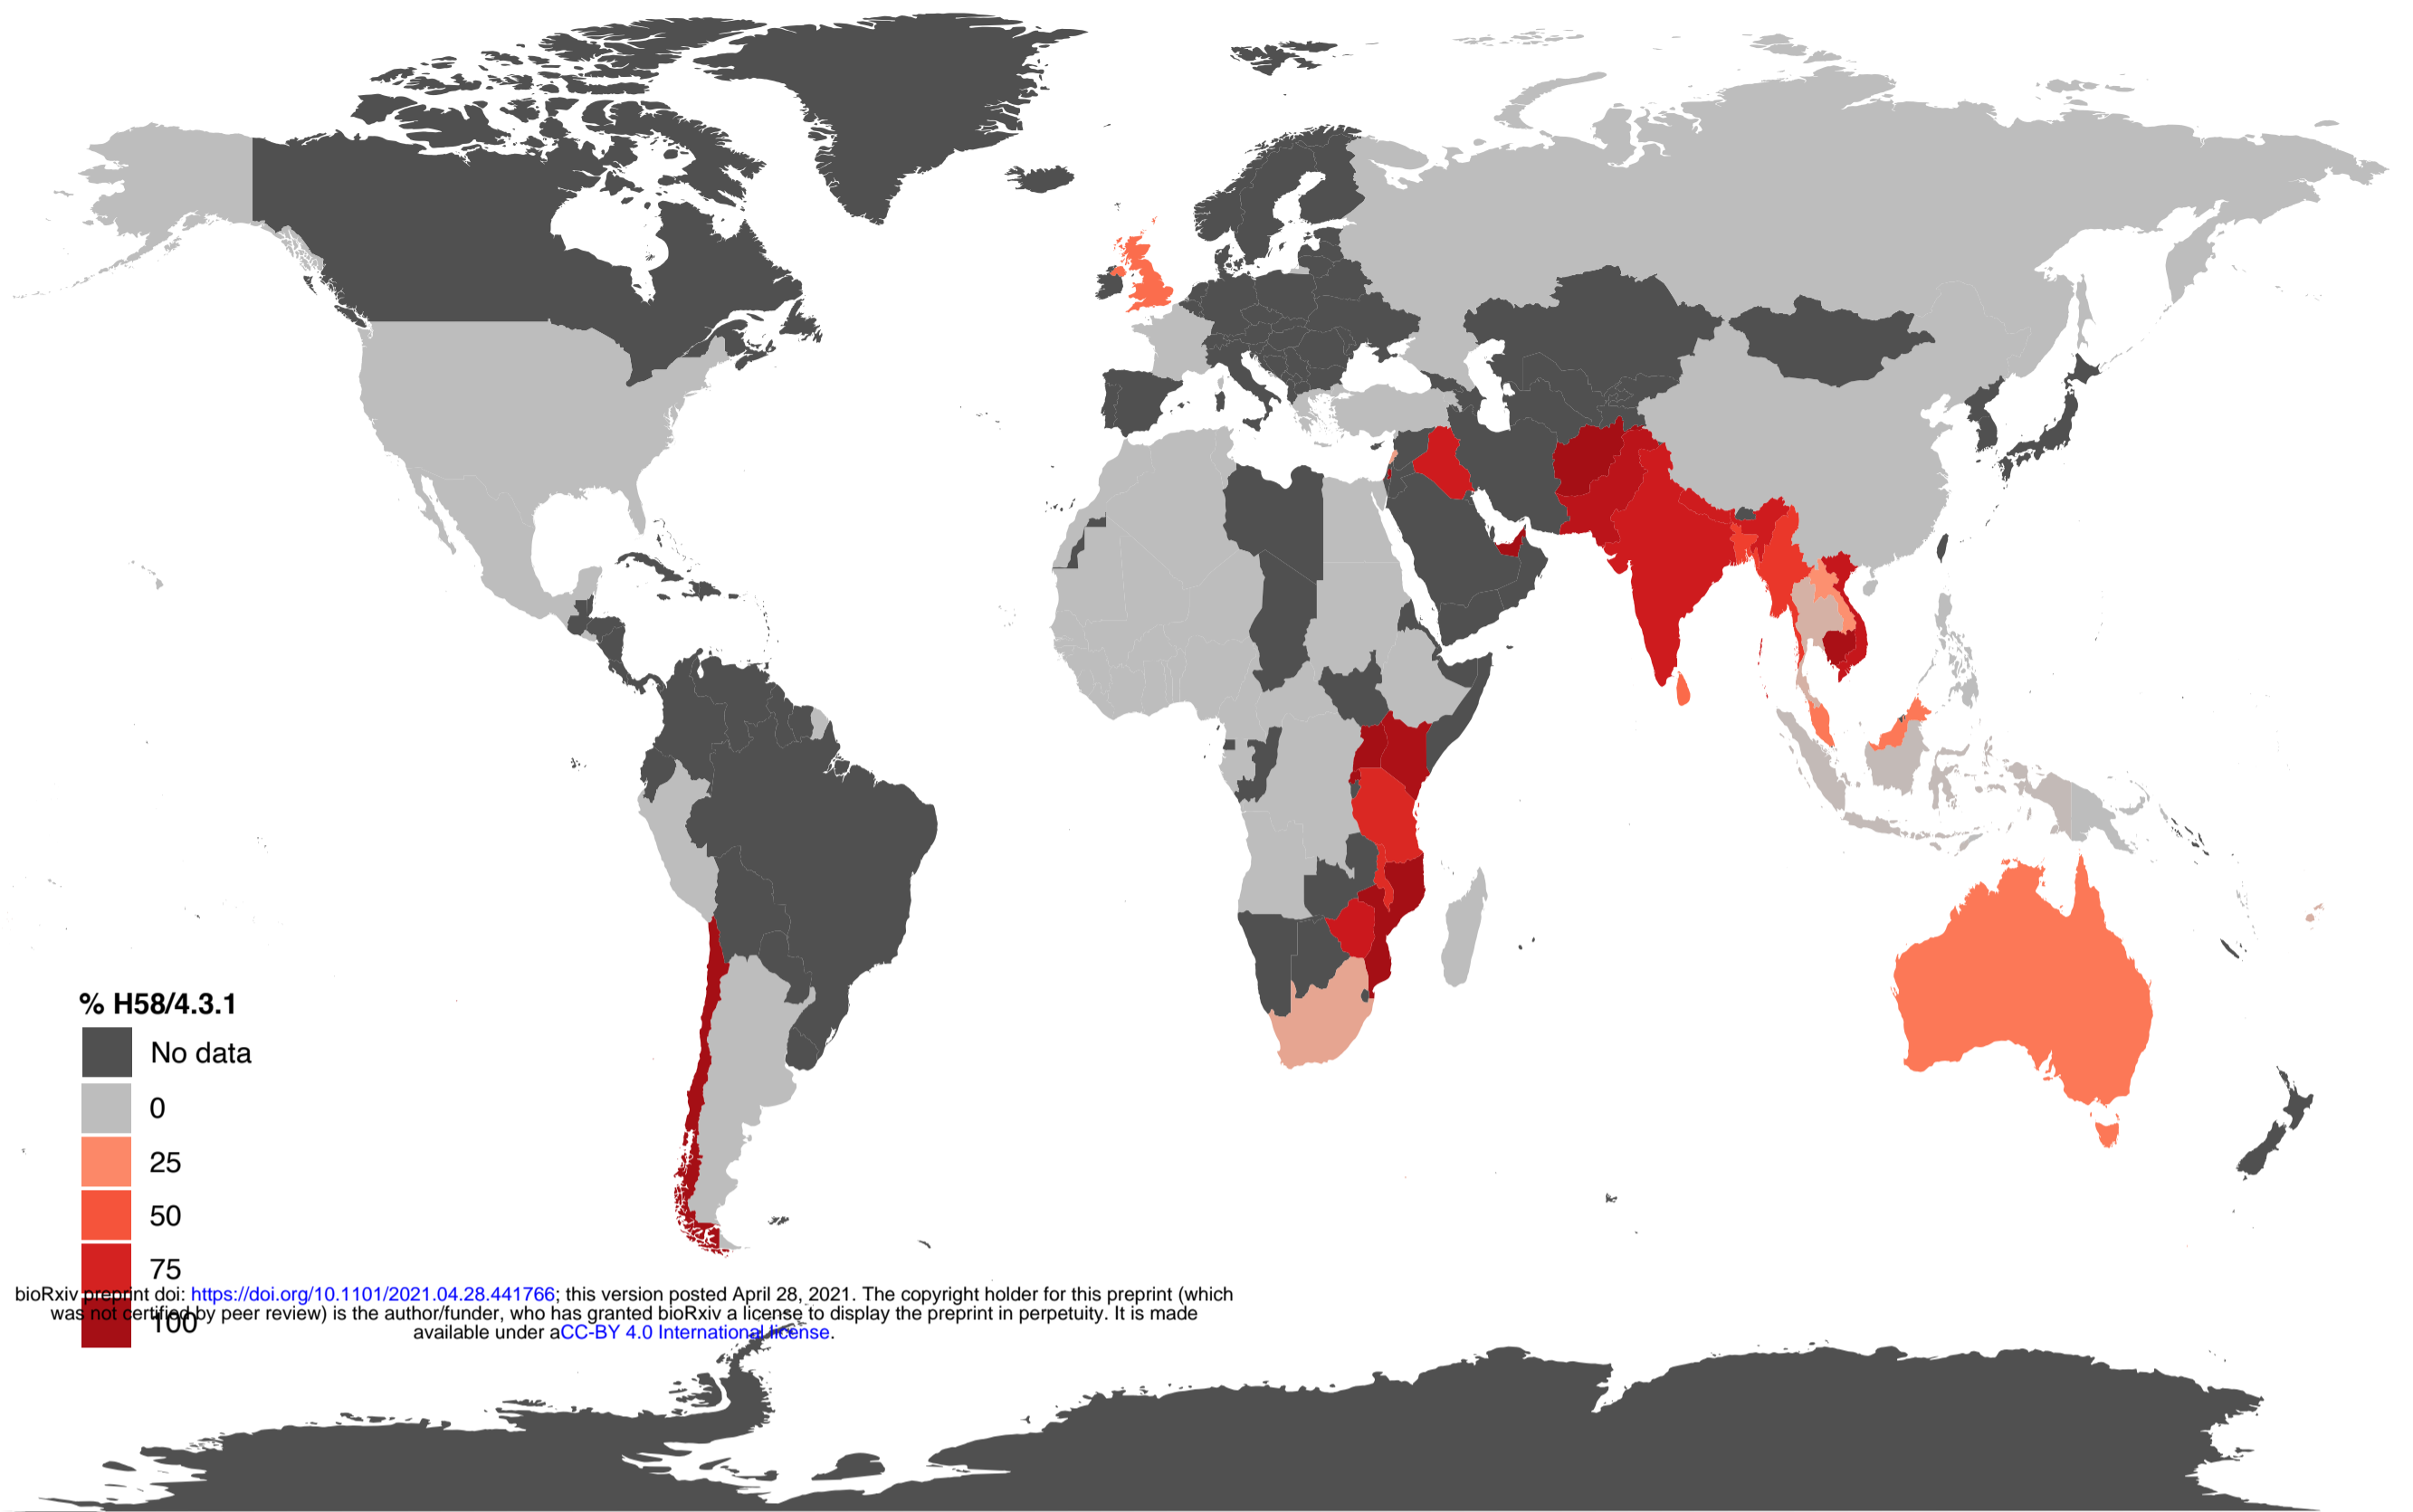

**B** Dominant genotypes per country

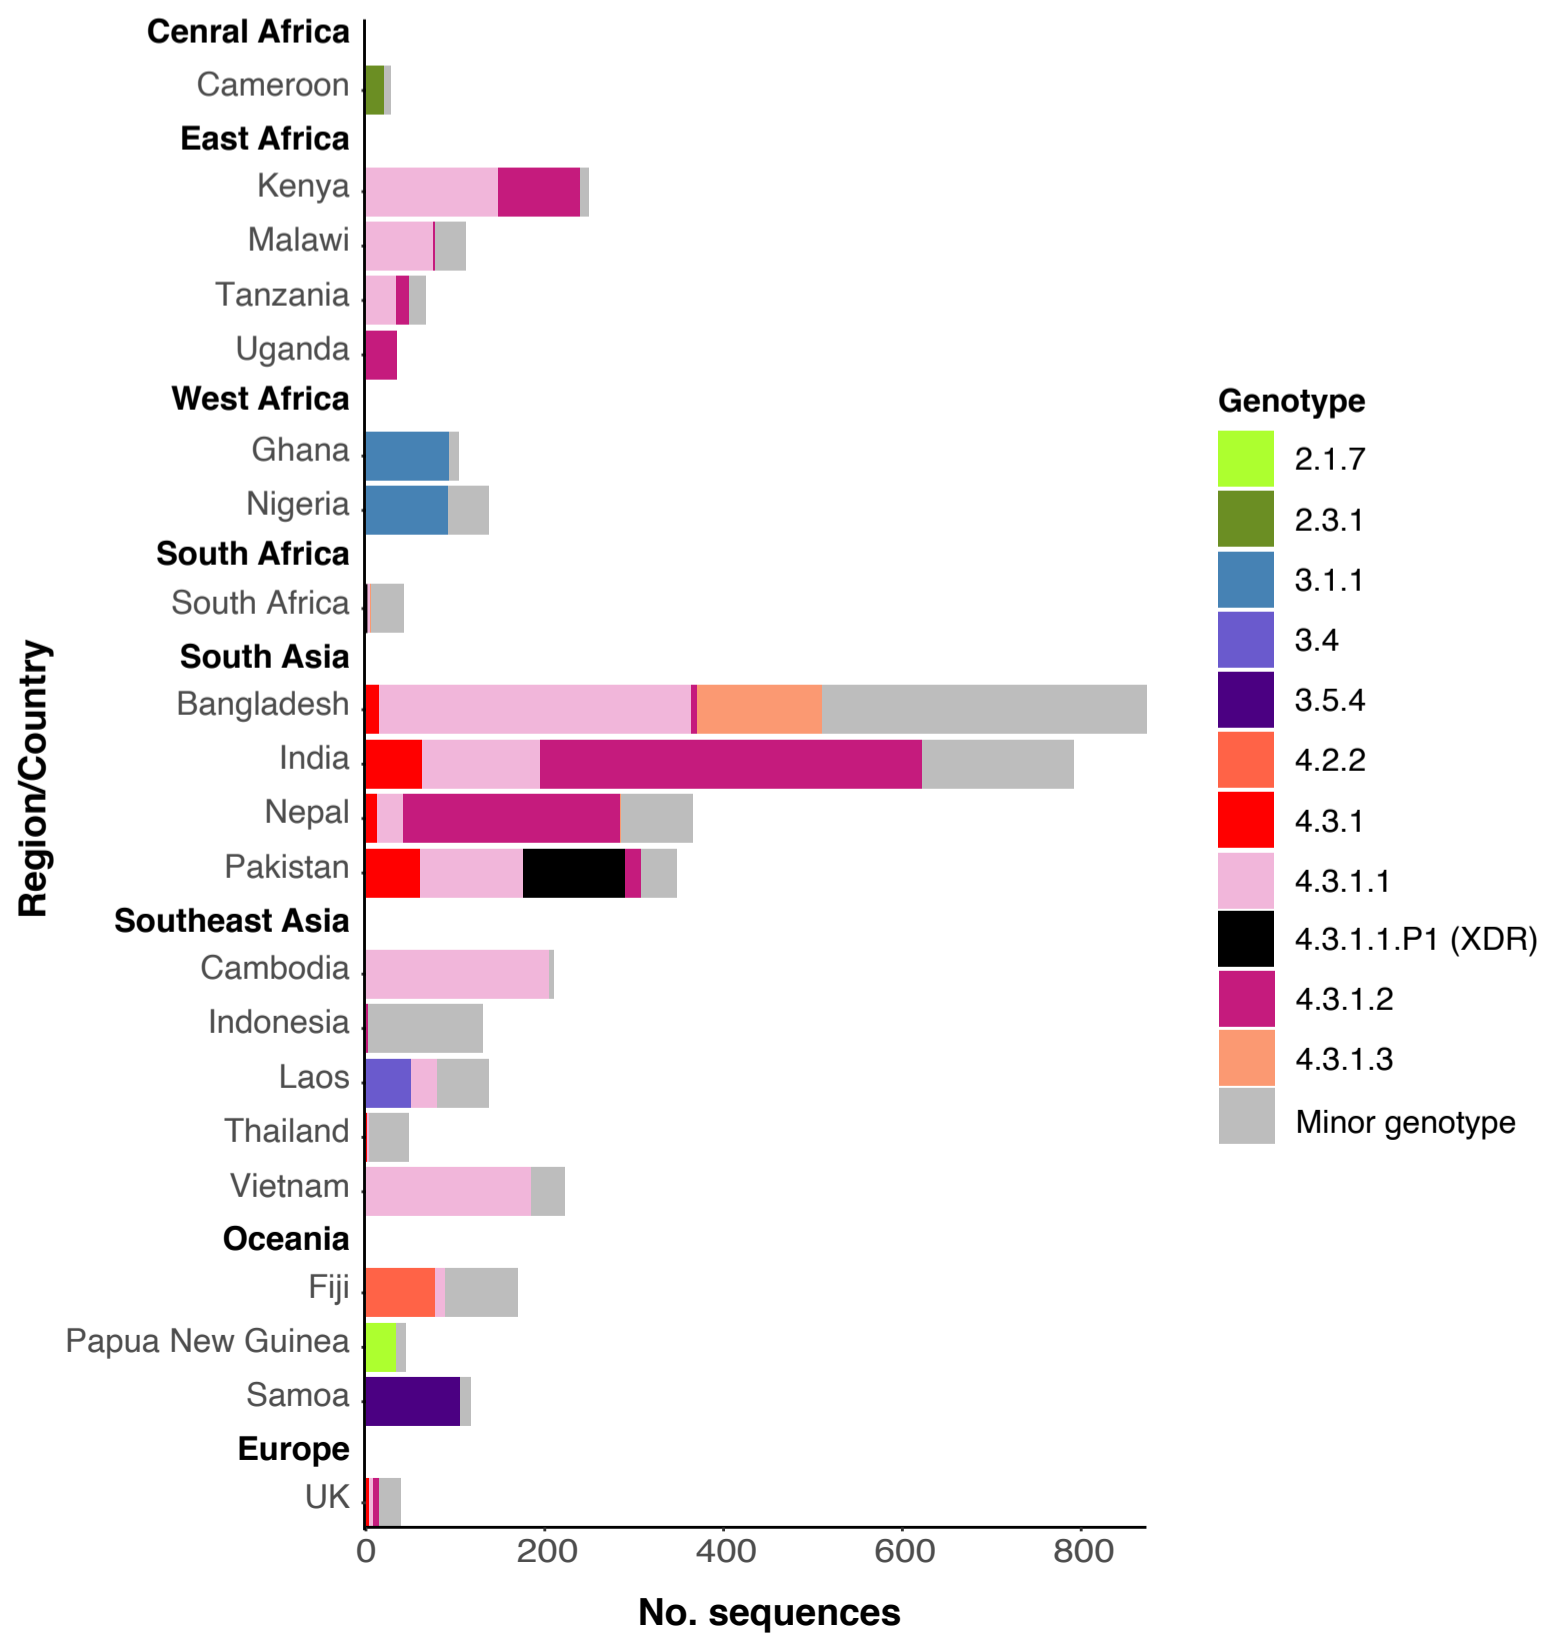

**C** Phylogenetic structure

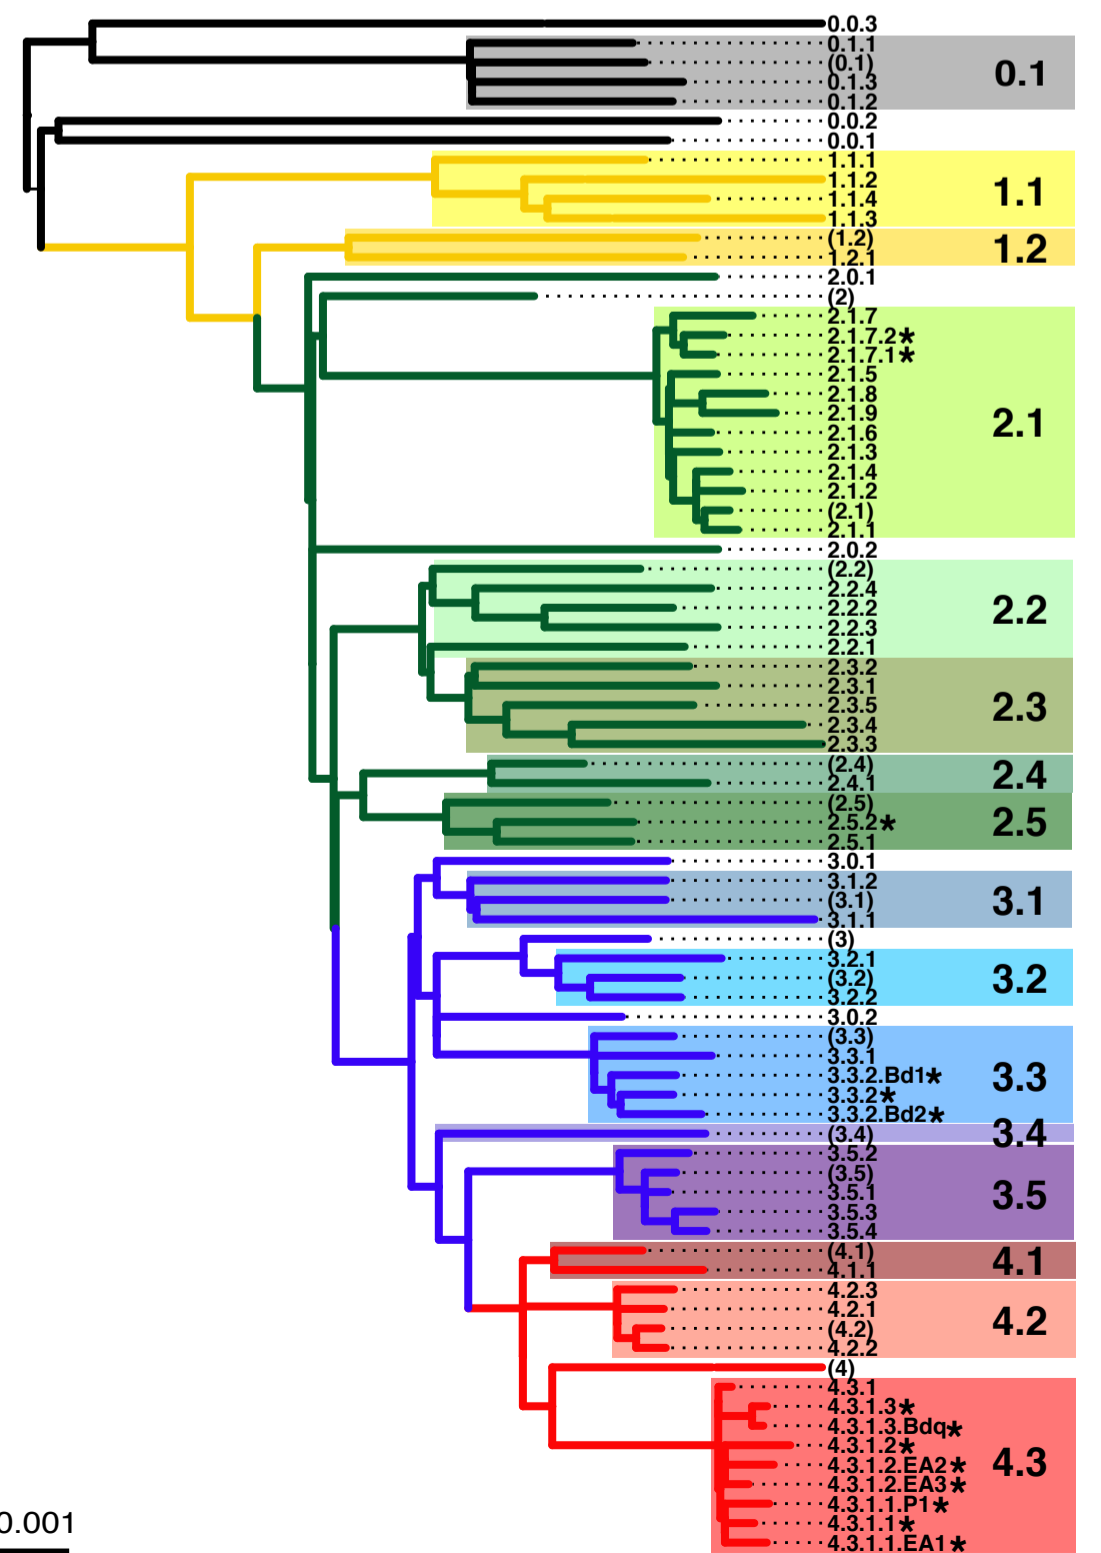

A

## Percentage sequenced with QRDR mutations per country

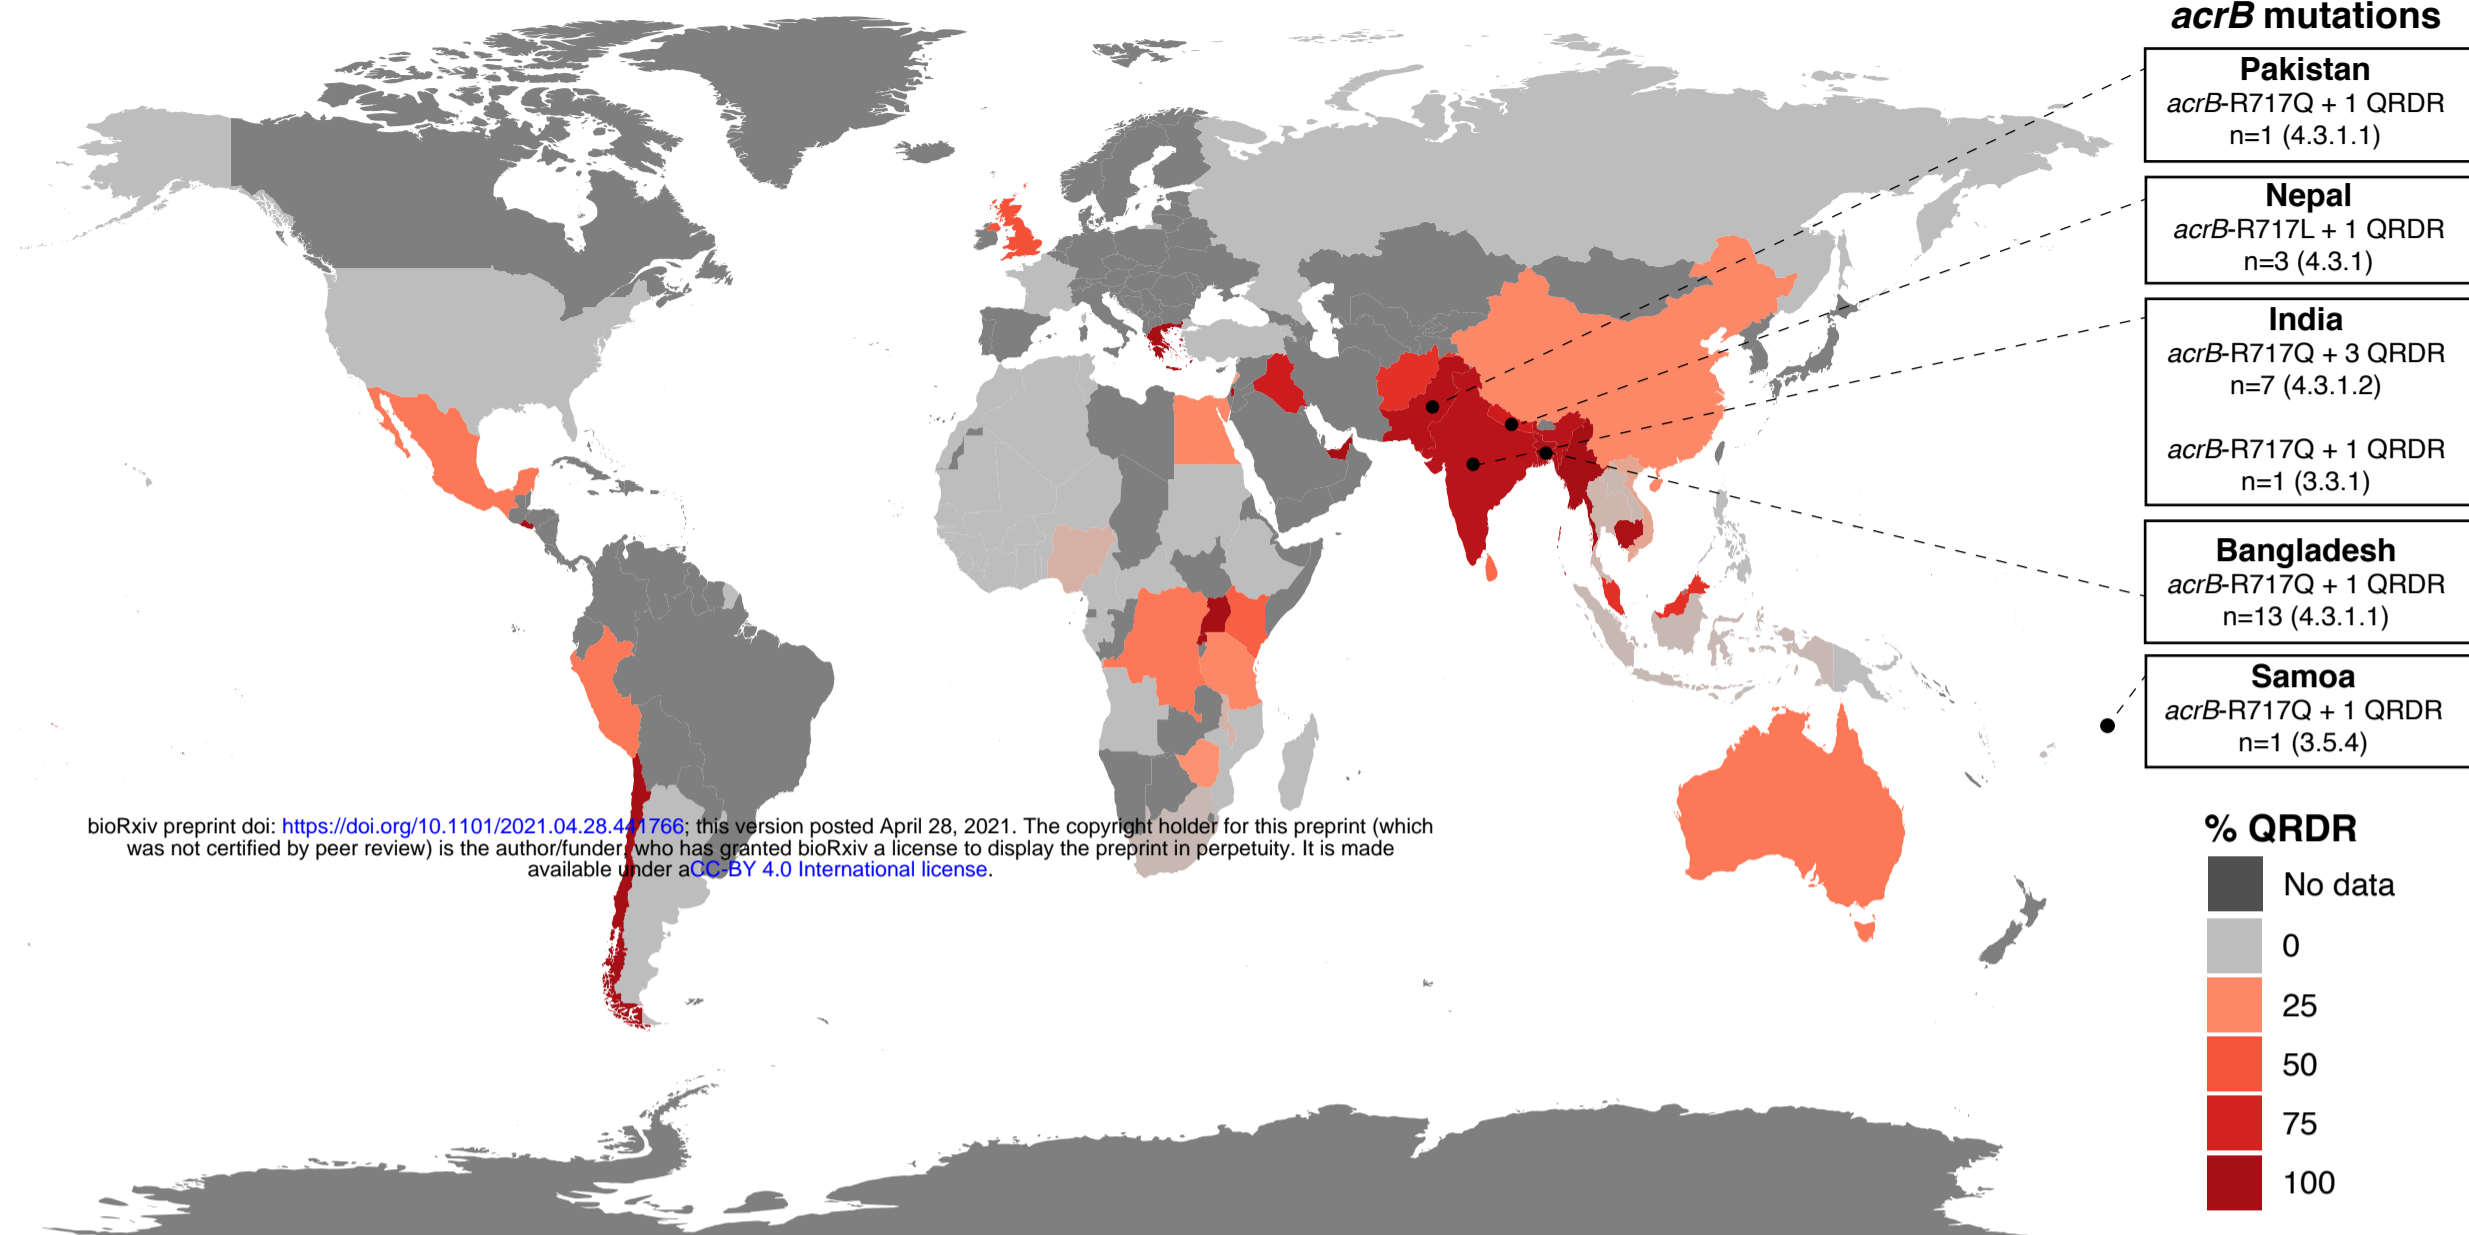

B

## Percentage sequenced with QRDR mutations per genotype and region

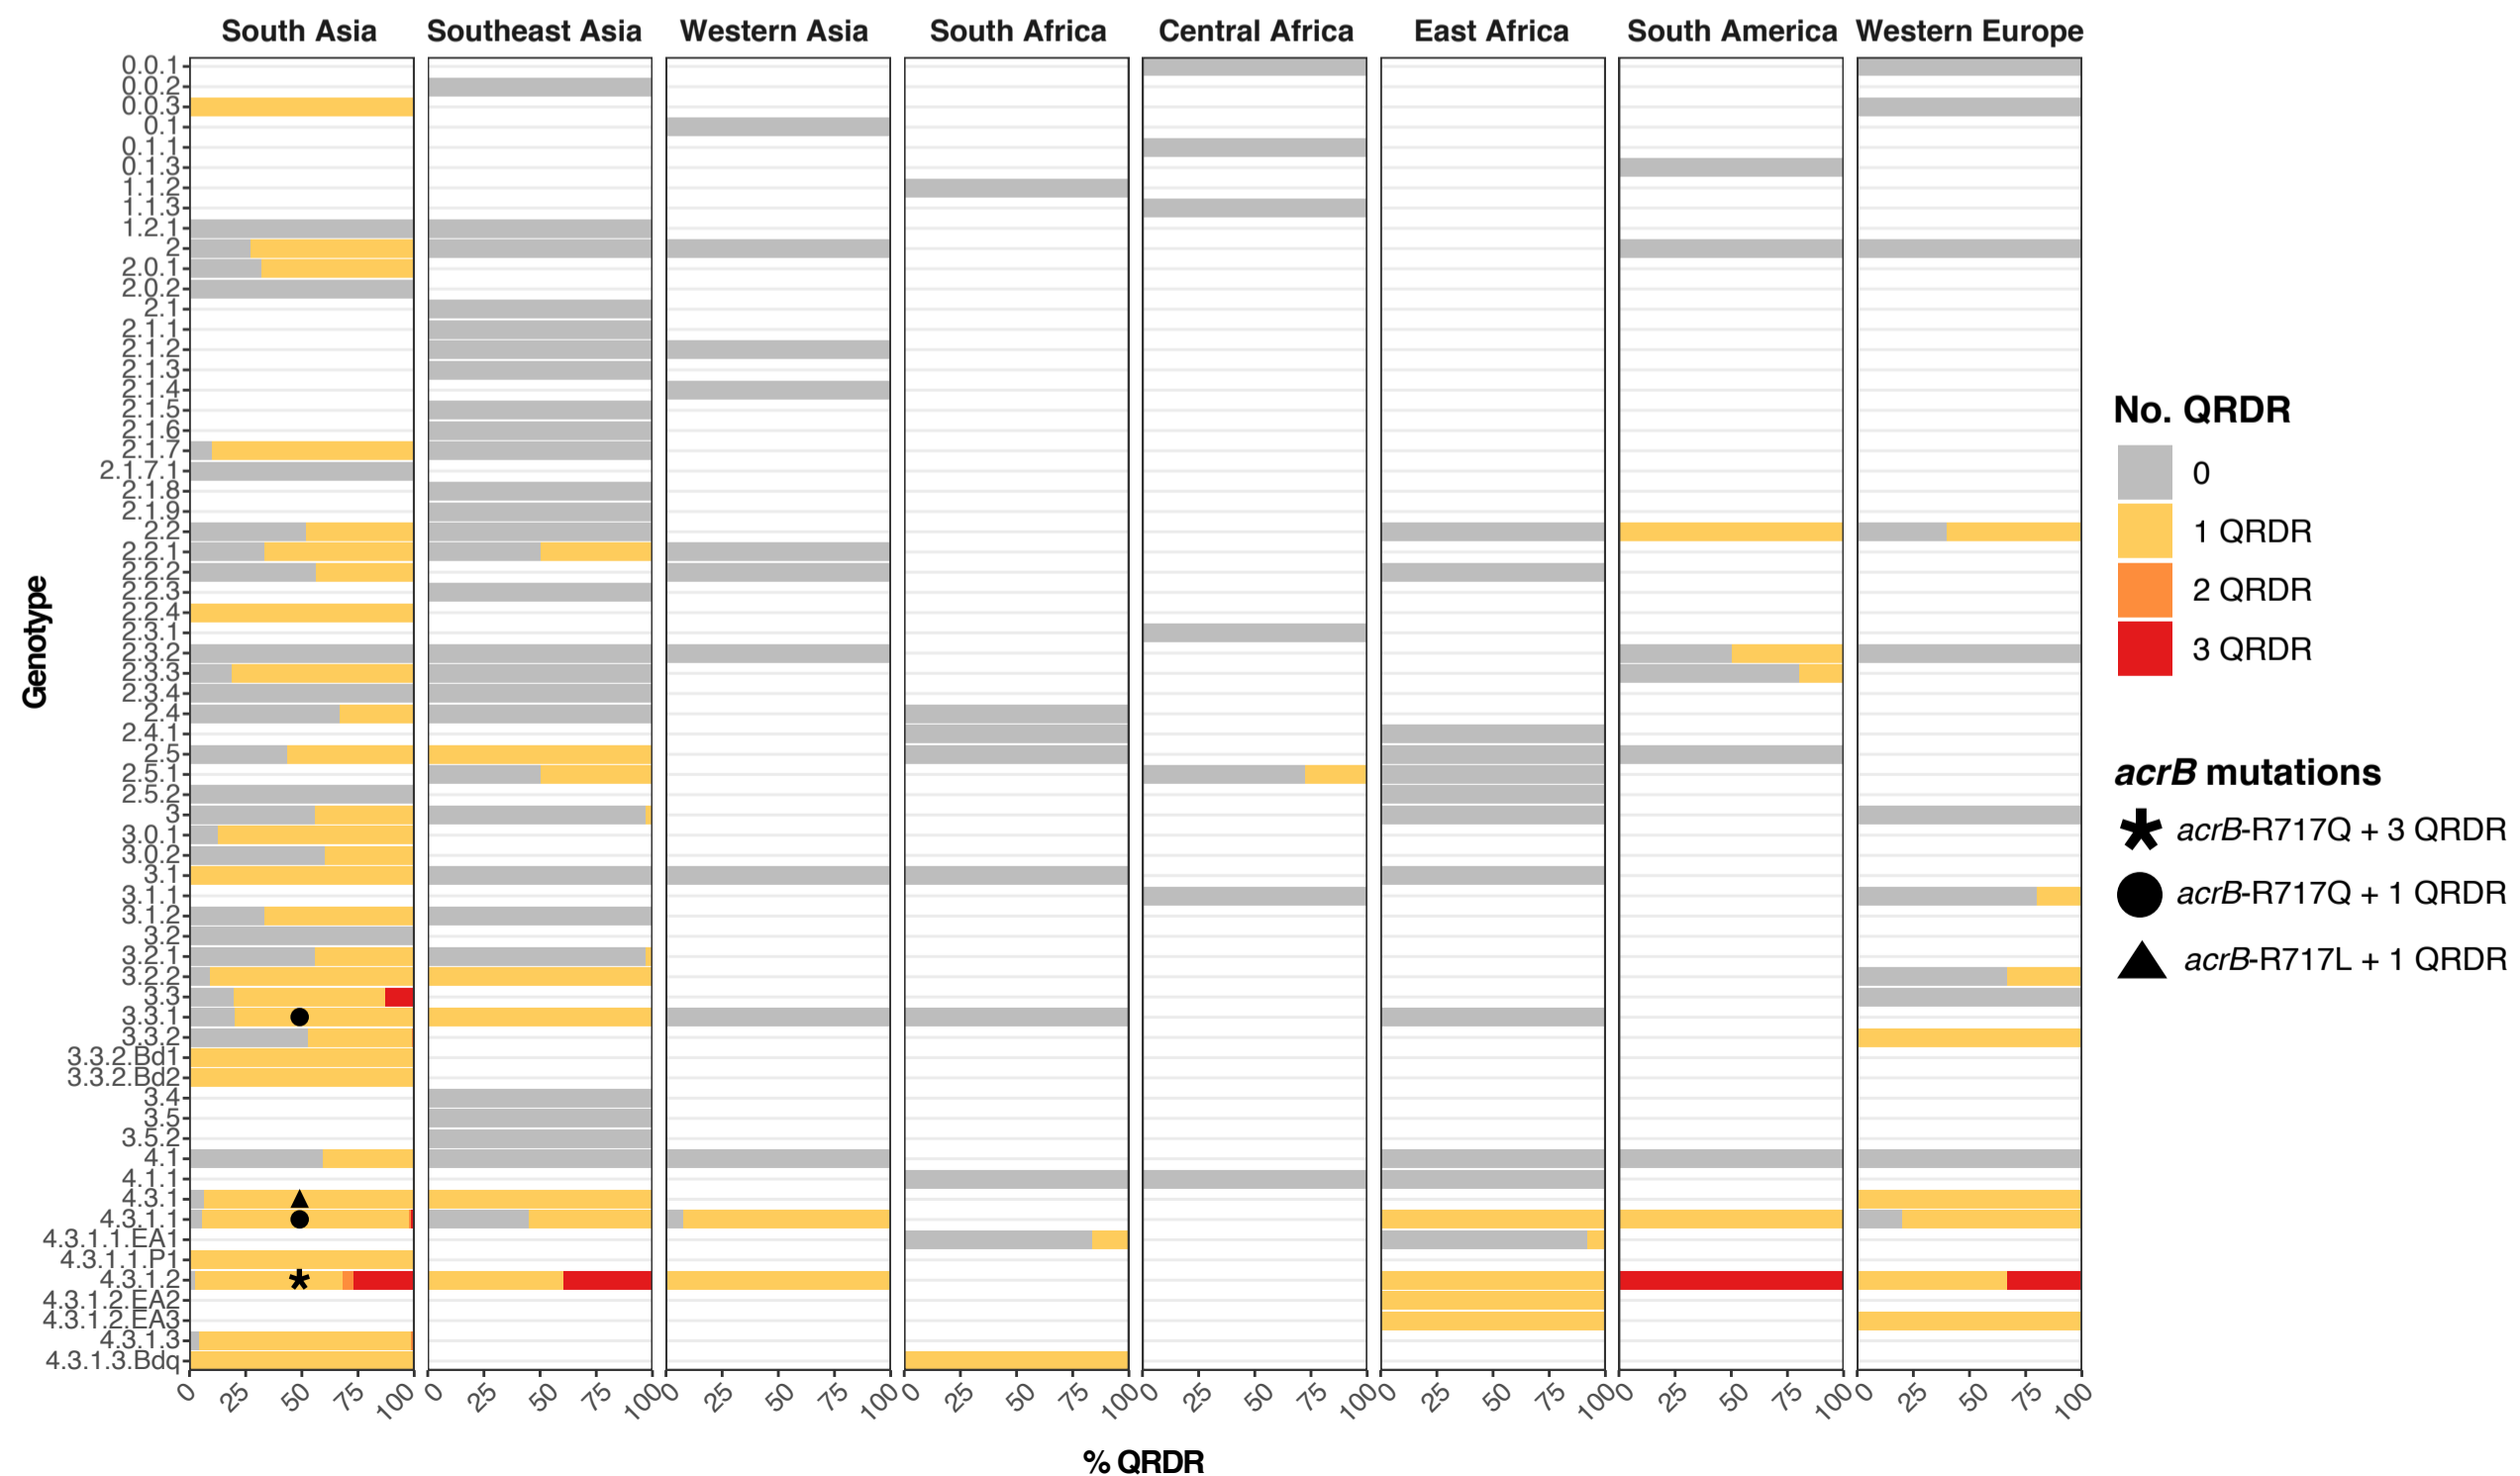

Source: https://www.biorxiv.org/content/10.1101/2021.04.28.441766v1.full.pdf
